# Supplementary material for: AI-Driven Virtual Patient Simulations for Communication Training in Medical Students: A Pilot Study
Source: Research Square preprint supplement (doi:10.21203/rs.3.rs-7270436/v1), 2025-10-27
Supplement: Supplementary file 1 [file 0401f809227c855af8538928.pdf]

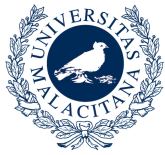

# FINAL QUESTIONNAIRE: Evaluation of AI Feedback in the Patient Simulation Application

## GENERAL INFORMATION

- Indicate your current year of study (if you are taking courses from different years, select the year with the most enrolled courses).
  - ☐ 1st year Medicine
  - ☐ 2nd year Medicine
  - ☐ 3rd year Medicine
  - ☐ 4th year Medicine
  - ☐ 5th year Medicine
  - ☐ 6th year Medicine
  - ☐ Other:
- Indicate the gender you identify with.
  - ☐ Woman
  - ☐ Man
  - ☐ Non-binary
- Indicate your current age.
- Which group do you belong to?

## QUALITY OF INTERACTION WITH AI

- How many times have you used this application?
  - ☐ This is my first time using it.
  - ☐ I have used it between 2 and 5 times.
  - ☐ I have used it more than 5 times.
- Have you used similar patient simulation applications?
  - ☐ Yes.
  - ☐ No.
- Did the interaction with the simulated patients feel natural?
  - ☐ Yes.
  - ☐ No.
- How would you evaluate the interaction with the simulated patients? Did it resemble reality?

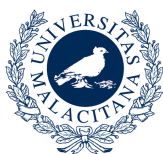

- Did you have previous experience conducting clinical interviews with patients in the Mental Health area? (Mark "Other" if you have experience interviewing real patients, but not psychiatric; specify which medical specialties).  
☐ Yes.  
☐ No.
- Please briefly describe your experience if you answered "Yes" above.

### QUALITY AND DEPTH OF FEEDBACK

Please rate your level of agreement with the following statements, from 0 (strongly disagree) to 10 (strongly agree):

- Overall, I am satisfied with the feedback received.
- The information provided was clear and easy to understand.
- The feedback offered an accurate evaluation of my interaction with the simulated patient.
- The feedback correctly addressed the essential aspects of the clinical interview and the specific metrics of the diagnosis.
- The feedback was useful to improve how I introduced myself and started communication with the patient.
- The feedback was useful to identify the chief complaint and to deepen the patient's current illness.
- The feedback provided useful strategies for exploring the patient's family and personal history.
- I consider that the feedback helps improve my clinical approach to a patient.
- The feedback was useful to identify areas of the clinical interview that I need to improve.
- The application increased my confidence in communicating with patients.
- I feel more prepared to conduct real clinical interviews with patients.
- I feel more motivated to improve my clinical skills.

### COMPARISON WITH OTHER FEEDBACK METHODS

Please rate your level of agreement with the following statements, from 0 (strongly disagree) to 10 (strongly agree):

- The feedback provided by the AI is more effective in acquiring communication skills.
- The feedback provided by the AI is more efficient, i.e., it allows acquiring these competencies more easily, with fewer costs and resources.
- The feedback provided by the AI does not replace the experience provided by clinical tutors; I prefer to receive their feedback in the future.
- The feedback provided by the AI is more useful for my training; I prefer to receive its feedback in the future.
- The feedback provided by the AI gives me the same information (in terms of quality and depth) as a clinical tutor.



- Both training with AI and real clinical practice are useful, so both should be offered complementarily.

## USE OF THE APPLICATION

- How easy did you find it to use the application?
  - ☐ Very easy
  - ☐ Easy
  - ☐ Average
  - ☐ Difficult
- Have you had any problems using the application?
  - ☐ No.
  - ☐ Yes.
- If you had difficulty using the application, please specify why.
- Do you think it is necessary to train students on how to use the application before using it?
  - ☐ No.
  - ☐ Yes.
- If yes, what aspects should students be trained on for using the application?
- Are there any functions that you think should be improved or added?

## SUGGESTIONS AND COMMENTS

- What aspects of the AI feedback do you consider most useful?
- What aspects of the AI feedback do you consider least useful?
- What would you improve in the AI feedback?
- Indicate the areas where you would like to receive more detailed feedback (e.g., body language, non-verbal communication, empathy).
- Any other comments or suggestions:

### Adapted from:

1. Holderried F, Stegemann-Philipps C, Herrmann-Werner A, Festl-Wietek T, Holderried M, Eickhoff C, et al. A language model–powered simulated patient with automated feedback for history taking: prospective study. JMIR Med Educ. 2024;10:e59213. doi:10.2196/59213
2. Setrakian J, Gauthier G, Bergeron L, Chamberland M, St-Onge C. Comparison of assessment by a virtual patient and by clinician-educators of medical students' history-taking skills: exploratory descriptive study. JMIR Med Educ. 2020;6(1):e14428. doi:10.2196/14428. PMID:32163036; PMCID:PMC7099396
